# Supplementary material for: Allosteric modulation of metabotropic glutamate receptor 4 activates IDO1-dependent, immunoregulatory signaling in dendritic cells
Source: PubMed Central journal article supplement — Neuropharmacology. 2016 Mar;102:59–71. doi: 10.1016/j.neuropharm.2015.10.036 (PMC4720030; doi:10.1016/j.neuropharm.2015.10.036), 2016-03
Supplement: mmc1.pdf [file mmc1.pdf]

## Supporting Information

### SI Results

**Pharmacodynamic Properties of ADX88178, ADX104608 and ADX104583.** Positive allosteric modulators (PAMs) are receptor ligands that bind to a site topographically distinct from that bound by the orthosteric agonist and enhance the potency and/or efficacy of the orthosteric agonist. Pharmacodynamic properties of PAMs are typically tested *in vitro* by evaluating their potentiating effect on a low orthosteric agonist concentration such as EC<sub>20</sub> (i.e., effective concentration causing 20% of the maximal effect). ADX88178 is an already proven selective PAM of metabotropic glutamate receptor 4 (mGluR4) (**Fig. 1**)(1), whereas ADX104608 and ADX104583 are novel constrained, structurally-related analogues of ADX88178 (structures not revealed for intellectual property protection). To test the potency of ADX88178, ADX104608, and ADX104583, we determined their effects at increasing concentrations on the response to Glu EC<sub>20</sub> (6 μM) in HEK293 cells stably expressing the human or rat mGlu4R-encoding gene. Co-transfection with the gene coding for Gα16, a protein that can redirect the signalling of non-Gq-coupled receptors to the phospholipase C-mediated calcium pathway, was used to detect mGluR4 activation by fluorescent cell based-Ca<sup>2+</sup> mobilization assay (as described in **SI Materials and Methods**). In HEK293 cells expressing either human or mGluR4, the addition of ADX88178 or ADX104608 at concentrations in the range of 1-50 nM greatly potentiated the effect of Glu. Specifically, in cells expressing human mGluR4, ADX88178 and ADX104608 increased the effect of Glu EC<sub>20</sub> up to 92% and 102% of the maximal Glu response, respectively, showing a half-maximal effective concentration (EC<sub>50</sub>) of 3.5 ± 0.3 nM and 39 ± 7.8 nM (mean ± SD), respectively. Similarly, in rat mGluR4<sup>+</sup> cells, ADX88178 and ADX104608 potentiated the response to Glu EC<sub>20</sub> up to 119% and 121% of the maximal Glu response with an EC<sub>50</sub> value of 9.0 ± 3.1 nM and 30 ± 7.2 nM, respectively. In contrast, ADX104583 did not display any modification in Ca<sup>2+</sup> mobilization in either human or rat mGluR4-expressing cells and was thus used as negative control in subsequent studies. Since neither ADX88178 (2) nor ADX104608 (unpublished data) modulated Glu responses in HEK2093 cells expressing group I, group II or other group III mGluRs (mGluR6, mGluR7, and mGluR8), these data indicate that ADX104608 and more so ADX88178 are potent and selective mGluR4 PAMs.

### SI Materials and Methods

**Generation of stable cell lines expressing human or rat mGluR4.** The cDNA encoding human or rat mGluR4 (hmGluR4 and rmGluR4, respectively) were subcloned into an expression vector

containing also the hygromycin resistance gene. In parallel, the cDNA encoding a Gα16 protein allowing redirection of the activation signal to intracellular calcium flux was subcloned into a different expression vector containing the puromycin resistance gene. Transfection of both vectors was performed into HEK293 cells with the PolyFect reagent (Qiagen), according to the supplier's protocol, and hygromycin and puromycin were used to select antibiotic resistant cells which had integrated stably both plasmids. Positive cellular clones, i.e., expressing mGluR4, were identified in a functional assay measuring changes in calcium fluxes in response to the EC<sub>20</sub> of Glu, the mGluR4 orthosteric agonist, in the presence or absence of different concentrations of PAMs. HEK293 cells expressing human or rat mGluR4 and Gα16 were maintained in media containing DMEM, dialyzed fetal calf serum (10 %), Glutamax™ (2 mM), penicillin (100 units/ml), streptomycin (100 µg/ml), geneticin (100 µg/ml), hygromycin-B (40 µg/ml) and puromycin (1 µg/ml), at 37°C with 5% CO<sub>2</sub> in a humidified atmosphere.

**Fluorescent cell based-Ca<sup>2+</sup> mobilization assay.** Assays were performed in a pH 7.4 buffered-solution containing 20 mM HEPES, 143 mM NaCl, 6 mM KCl, 1 mM MgSO<sub>4</sub>, 1 mM CaCl<sub>2</sub>, 0.125 mM sulfinpyrazone, and 0.1 % glucose. Twenty four hours prior to the experiment, human and rat mGluR4-transfected HEK293 cells were plated out at a density of 2.5 x 10<sup>4</sup> cells/well in black-well/clear-bottomed and poly-L-ornithine-coated 384-well plates in a glutamine/glutamate free DMEM medium containing 10% fetal bovine serum, 100 units/ml penicillin and 100 µg/ml streptomycin. On the day of the assay, cells were loaded with a 3 µM solution of Fluo4-AM (LuBioScience) in an assay buffer containing 0.03% pluronic acid. After 1 h at 37°C with 5% CO<sub>2</sub> in a humidified atmosphere, the extracellular dye was removed by washing the cell plate with the assay buffer and calcium flux was measured using a FLIPR (Molecular Devices). After 10 sec of basal fluorescence recording, various concentrations of the compounds to be tested were added to the cells. Changes in fluorescence levels were first monitored for 180 sec in order to detect any agonist activity of the compounds. Then, cells were stimulated by Glu EC<sub>20</sub> for an additional 110 sec in order to measure enhancement activity of the compounds.

## SI References

1. Kalinichev M, *et al.* (2014) Characterization of the Novel Positive Allosteric Modulator of the Metabotropic Glutamate Receptor 4 ADX88178 in Rodent Models of Neuropsychiatric Disorders. *The Journal of pharmacology and experimental therapeutics* 350(3):495-505.
2. Le Poul E, *et al.* (2012) A potent and selective metabotropic glutamate receptor 4 positive allosteric modulator improves movement in rodent models of Parkinson's disease. *The Journal of pharmacology and experimental therapeutics* 343(1):167-177.

**Supplementary Table S1.** Plasma Levels of ADX88178 in mice with Relapsing-Remitting Experimental Autoimmune Encephalomyelitis (RR-EAE; doses of 10 and 60 mg/kg) and naive SJL mice (dose of 30 mg/kg).

| <b>Dose 10 mg/kg</b> |         |               |         |               |         |               |
|----------------------|---------|---------------|---------|---------------|---------|---------------|
|                      | Day 1   |               | Day 7   |               | Day 14  |               |
| Time (h)             | mouse # | conc. (ng/ml) | mouse # | conc. (ng/ml) | mouse # | conc. (ng/ml) |
| 0                    | m1      | BLQ           | m1      | BLQ           | m1      | 4.20          |
|                      | m2      | BLQ           | m2      | 2.40          | m2      | 9.60          |
| 1                    | m3      | 188           | m3      | 17.4          | m3      | 168           |
|                      | m4      | 188           | m4      | 39.6          | m4      | 144           |
| 6                    | m1      | 7.83          | m1      | 156           | m1      | 21.9          |
|                      | m2      | 51.7          | m2      | 38.3          | m2      | 46.9          |
| 24                   | m3      | BLQ           | m3      | BLQ           | m3      | BLQ           |
|                      | m4      | BLQ           | m4      | BLQ           | m4      | 5.90          |
| <b>Dose 60 mg/kg</b> |         |               |         |               |         |               |
|                      | Day 1   |               | Day 7   |               | Day 14  |               |
| Time (h)             | mouse # | conc (ng/ml)  | mouse # | conc (ng/ml)  | mouse # | conc (ng/ml)  |
| 0                    | m5      | BLQ           | m5      | 110           | m5      | 77.0          |
|                      | m6      | BLQ           |         |               |         |               |
| 1                    | m7      | 251           | m7      | 203           | m7      | 330           |
|                      | m8      | 782           | m8      | 270           | m8      | 303           |
| 6                    | m5      | 122           | m5      | 188           | m5      | 326           |
|                      | m6      | 115           |         |               |         |               |
| 24                   | m7      | 36.9          | m7      | 64.3          | m7      | 102           |
|                      | m8      | 30.5          | m8      | 20.9          | m8      | 77            |

| Time (h) | Dose (mg/kg) | Terminal sampling |              |
|----------|--------------|-------------------|--------------|
|          |              | mouse #           | conc (ng/ml) |
| 1        | 10           | m1                | 65.7         |
|          |              | m2                | 48.0         |
|          |              | m3                | 72.0         |
|          |              | m4                | 81.1         |
| 1        | 60           | m5                | 200          |
|          |              | m7                | 235          |
|          |              | m8                | 299          |

| Time (h) | Dose 30 mg/kg | Day 1   |              |
|----------|---------------|---------|--------------|
|          |               | mouse # | conc (ng/mL) |
| 1        | 30            | m1      | 230          |
|          |               | m2      | 481          |
|          |               | m3      | 550          |
| 6        | 30            | m4      | 123          |
|          |               | m5      | 87,1         |
|          |               | m6      | 25,8         |
| 24       | 30            | m4      | 15,2         |
|          |               | m5      | 12,5         |
|          |               | m6      | 7,86         |

**Table S2.** Statistical Analysis of RR-EAE experiments of PHCCC- and ADX88178- vs. vehicle-treated groups.

**ENTIRE PERIOD:**

| <b>Comparison</b>                      | <b>Significance</b>      |                             |                               |
|----------------------------------------|--------------------------|-----------------------------|-------------------------------|
|                                        | <i>min-P<sup>a</sup></i> | <i>global-P<sup>b</sup></i> | <i>adjusted-P<sup>c</sup></i> |
| <i>PHCCC vs. vehicle</i>               | 0.0306<br>*              | 0.1763                      | 0.3526                        |
| <i>ADX88178 (10 mg/kg) vs. vehicle</i> | 0.1405                   | 0.4513                      | 0.4513                        |
| <i>ADX88178 (30 mg/kg) vs. vehicle</i> | 0.0149<br>*              | 0.0853                      | 0.2559                        |
| <i>ADX88178 (60 mg/kg) vs. vehicle</i> | 0.0008<br>***            | 0.0095<br>**                | 0.0380<br>*                   |

**ON TREATMENT:**

| <b>Comparison</b>                      | <b>Significance</b> |                 |                   |
|----------------------------------------|---------------------|-----------------|-------------------|
|                                        | <i>min-P</i>        | <i>global-P</i> | <i>adjusted-P</i> |
| <i>PHCCC vs. vehicle</i>               | 0.0306<br>*         | 0.1459          | 0.2918            |
| <i>ADX88178 (10 mg/kg) vs. vehicle</i> | 0.1405              | 0.3883          | 0.3883            |
| <i>ADX88178 (30 mg/kg) vs. vehicle</i> | 0.0149<br>*         | 0.0646          | 0.1938            |
| <i>ADX88178 (60 mg/kg) vs. vehicle</i> | 0.0008<br>***       | 0.0058<br>**    | 0.0232<br>*       |

**POST TREATMENT:**

| <b>Comparison</b>                      | <b>Significance</b> |                 |                   |
|----------------------------------------|---------------------|-----------------|-------------------|
|                                        | <i>min-P</i>        | <i>global-P</i> | <i>adjusted-P</i> |
| <i>PHCCC vs. vehicle</i>               | 0.2768              | 0.4833          | 0.9666            |
| <i>ADX88178 (10 mg/kg) vs. vehicle</i> | 0.3539              | 0.5411          | 0.9666            |
| <i>ADX88178 (30 mg/kg) vs. vehicle</i> | 0.0292<br>*         | 0.0868          | 0.2764            |
| <i>ADX88178 (60 mg/kg) vs. vehicle</i> | 0.02132<br>*        | 0.0691          | 0.2764            |

<sup>a</sup>minimum *P*-value obtained from Wilcoxon-Mann-Whitney tests

<sup>b</sup>*P*-value resulting from the Westfall & Young maxT method

<sup>c</sup>multiplicity-adjusted *P*-value obtained by the Bonferroni-Holm method

**Table S3.** Statistical Analysis of RR-EAE experiments of PHCCC- vs. ADX88178-treated groups.**ENTIRE PERIOD:**

| <b>Comparison</b>             | <b>Significance</b>      |                             |                               |
|-------------------------------|--------------------------|-----------------------------|-------------------------------|
|                               | <i>min-P<sup>a</sup></i> | <i>global-P<sup>b</sup></i> | <i>adjusted-P<sup>c</sup></i> |
| ADX88178 (10 mg/kg) vs. PHCCC | 0.3646                   | 0.7967                      | 0.7967                        |
| ADX88178 (30 mg/kg) vs. PHCCC | 0.0437<br>*              | 0.2173                      | 0.4346                        |
| ADX88178 (60 mg/kg) vs. PHCCC | 0.0106<br>*              | 0.0961                      | 0.2883                        |

**ON TREATMENT:**

| <b>Comparison</b>             | <b>Significance</b> |                 |                   |
|-------------------------------|---------------------|-----------------|-------------------|
|                               | <i>min-P</i>        | <i>global-P</i> | <i>adjusted-P</i> |
| ADX88178 (10 mg/kg) vs. PHCCC | 0.5492              | 0.8606          | 0.8606            |
| ADX88178 (30 mg/kg) vs. PHCCC | 0.0468<br>*         | 0.1972          | 0.3944            |
| ADX88178 (60 mg/kg) vs. PHCCC | 0.0106<br>*         | 0.0730          | 0.2190            |

**POST TREATMENT:**

| <b>Comparison</b>             | <b>Significance</b> |                 |                   |
|-------------------------------|---------------------|-----------------|-------------------|
|                               | <i>min-P</i>        | <i>global-P</i> | <i>adjusted-P</i> |
| ADX88178 (10 mg/kg) vs. PHCCC | 0.3646              | 0.5793          | 0.5793            |
| ADX88178 (30 mg/kg) vs. PHCCC | 0.0437<br>*         | 0.1219          | 0.3657            |
| ADX88178 (60 mg/kg) vs. PHCCC | 0.0360<br>*         | 0.1246          | 0.3657            |

<sup>a</sup>minimum *P*-value obtained from Wilcoxon-Mann-Whitney tests

<sup>b</sup>*P*-value resulting from the Westfall & Young maxT method

<sup>c</sup>multiplicity-adjusted *P*-value obtained by the Bonferroni-Holm method

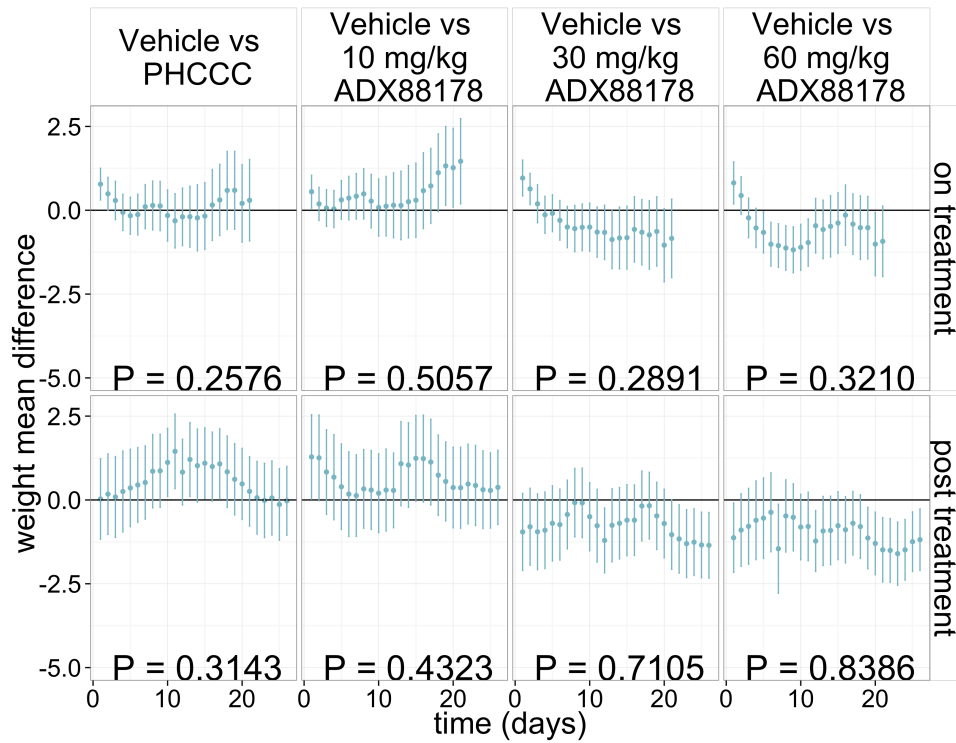

**Supplementary Fig. S1.** Body weight mean differences during (on treatment; day 0 corresponding to day 10 post-PLP sensitization) or after drug treatment (post-treatment; day 0 corresponding to day 31 post-PLP sensitization). Indicated *P*-values represent the global *P*-values for each group in each time period.

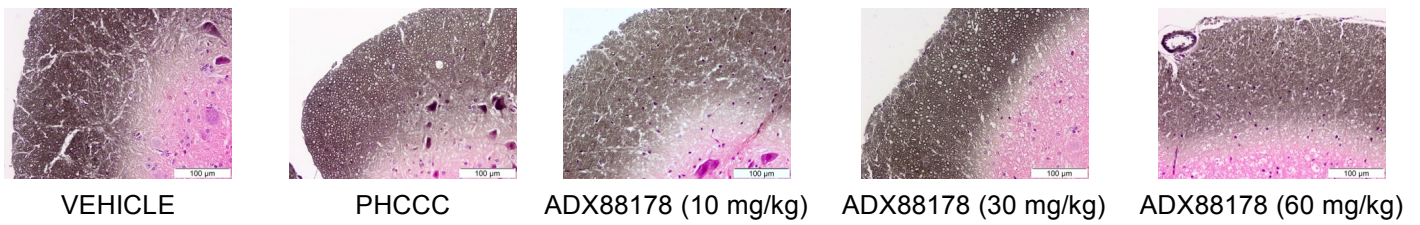

**Supplementary Fig. S2.** Histopathological analysis of spinal cord sections of one representative mouse from each group (indicated) at 60 d after immunization. Spinal cord sections were immunostained for myelin-binding protein (MBP) to evaluate myelin depletion and stained with H&E to assess inflammation.
